# Supplementary material for: Phase IIa Proof-of-Concept Evaluation of the Antiviral Efficacy, Safety, Tolerability, and Pharmacokinetics of the Next-Generation Maturation Inhibitor GSK3640254
Source: PubMed Central journal article supplement — Clin Infect Dis. 2022 Jan 6;75(5):786–94. doi: 10.1093/cid/ciab1065 (PMC9536290; doi:10.1093/cid/ciab1065), 2022-01-06
Supplement: ciab1065_suppl_supplementary_material.pdf [file ciab1065_suppl_supplementary_material.pdf]

## ONLINE SUPPLEMENTARY MATERIAL

### **Phase IIa Proof-of-Concept Evaluation of the Antiviral Efficacy, Safety, Tolerability, and Pharmacokinetics of the Next-Generation Maturation Inhibitor GSK3640254**

Christoph D. Spinner,<sup>1</sup> Franco Felizarta,<sup>2</sup> Giuliano Rizzardini,<sup>3,4</sup> Patrick Philibert,<sup>5</sup> Essack Mitha,<sup>6</sup> Pere Domingo,<sup>7</sup> Christoph J. Stephan,<sup>8</sup> Michelle DeGrosky,<sup>9</sup> Veronica Bainbridge,<sup>10</sup> Joyce Zhan,<sup>11</sup> Teodora Pene Dumitrescu,<sup>11</sup> Jerry L. Jeffrey,<sup>12</sup> Jianfeng Xu,<sup>13</sup> Fiona Halliday,<sup>10</sup> Jianjun Gan,<sup>11</sup> Mark Johnson,<sup>12</sup> Martin Gartland,<sup>12</sup> Samit R. Joshi,<sup>9</sup> Max Lataillade<sup>9</sup>;  
208132 Study Team

<sup>1</sup>Technical University of Munich, School of Medicine, University hospital rechts der Isar, Department of Internal Medicine II, Munich, Germany; <sup>2</sup>Office of Franco Felizarta, MD, Bakersfield, CA, USA; <sup>3</sup>Infectious Diseases, ASST Fatebenefratelli Ospedale Sacco, Milan, Italy; <sup>4</sup>School of Clinical Medicine, Faculty of Health Science, University of the Witwatersrand, Johannesburg, South Africa; <sup>5</sup>Infectious Disease, Hôpital Européen de Marseille, Marseille, France; <sup>6</sup>Newtown Clinical Research, Johannesburg, South Africa; <sup>7</sup>Infectious Diseases Unit, Hospital Santa Creu i Sant Pau, Barcelona, Spain; <sup>8</sup>Infectious Diseases Unit, Universitätsklinikum Frankfurt, Frankfurt, Germany; <sup>9</sup>ViiV Healthcare, Branford, CT, USA; <sup>10</sup>GlaxoSmithKline, Stockley Park, UK; <sup>11</sup>GlaxoSmithKline, Collegeville, PA, USA; <sup>12</sup>ViiV Healthcare, Research Triangle Park, NC, USA; <sup>13</sup>GlaxoSmithKline, Upper Providence, PA, USA

## Table of Contents

|                             |   |
|-----------------------------|---|
| Supplementary Methods ..... | 3 |
|-----------------------------|---|

## **Supplementary Methods**

### ***Exclusion Criteria***

Relevant exclusion criteria included positive test results for active hepatitis B, hepatitis C, alanine aminotransferase levels  $>2\times$  the upper limit of normal, and bilirubin levels  $>1.5\times$  the upper limit of normal. Individuals were excluded if they had a history of psychiatric disorders; received an immunomodulatory or anti-HIV agent within 30 days; or had primary HIV infection, ongoing nonlocalized malignancy, or any active Centers for Disease Control and Prevention category C disease.

### ***Sample Collection Times***

Plasma HIV-1 RNA was assessed predose at each visit in parts 1 and 2 and quantified using polymerase chain reaction assay. Blood samples collected predose on Days 1 and 11 in part 1 and Days 1 and 8 in part 2 were analyzed for HIV-1 genotypic and phenotypic testing conducted by Monogram Biosciences (South San Francisco, CA). Genotype was assessed using next-generation sequencing. Blood samples were collected predose for a single PK assessment on Days 3 or 4 in parts 1 and 2; Days 5, 6, or 7 in part 1; and Days 5 or 6 in part 2. Blood samples for intensive PK sampling were collected predose and 1, 2, 3, 4, 5, 6, 8, 12, and 24 hours postdose on Days 1 and 8, 9, or 10 in part 1 and Days 1 and 7 in part 2.
